# Supplementary material
Source: MDPI journal article supplement (https://www.mdpi.com/2673-9976/12/1/10)
Supplement: s1 [file s1]

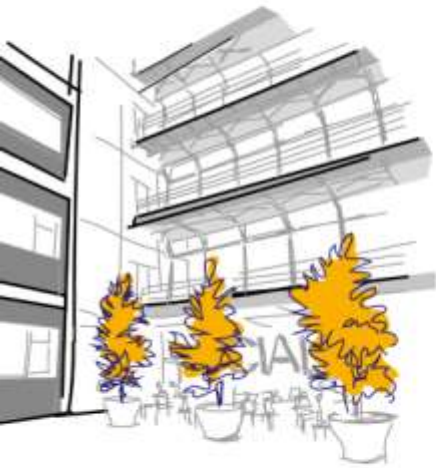

# Modulatory effects of a lunasin-enriched soybean extract on immune response and oxidative stress-associated biomarkers

Samuel Paterson, Samuel Fernández-Tomé, Blanca Hernández-Ledesma

The 2nd International Electronic Conference on Nutrients  
Section: Nutrition and Immunology

## Bioactive Peptides

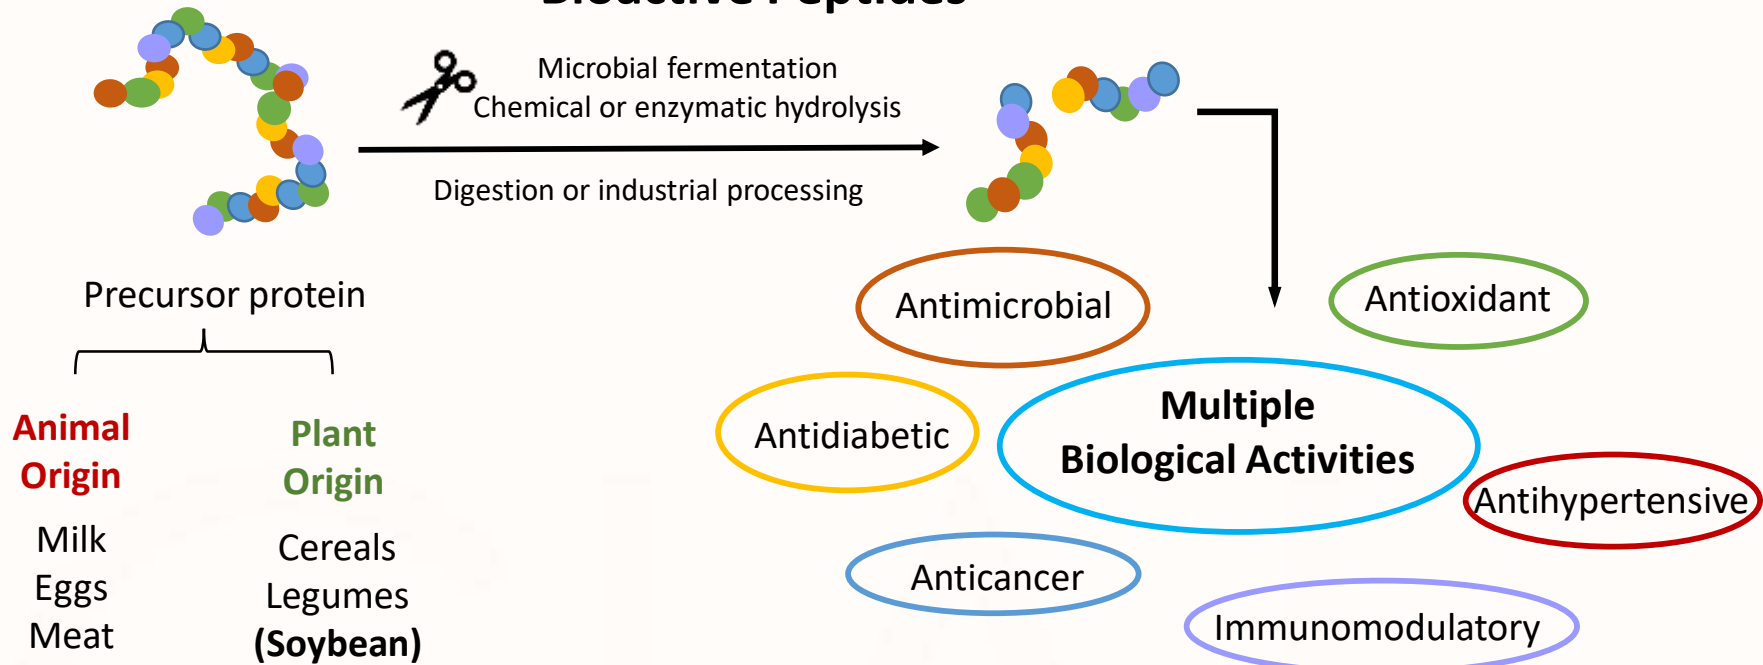

## Lunasin

Gm2S-1 albumin 2S  
43 amino acids

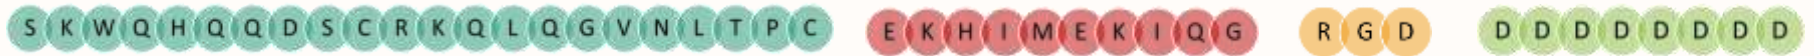

1-22

Unknown function

Possible interaction with deacetylated H4

23-32

Histone H4 binding

33-35

Cell adhesion

36-43

Inhibits H3 acetylation

### Sources

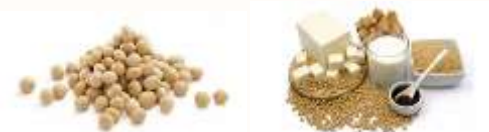

Soybean and soy products

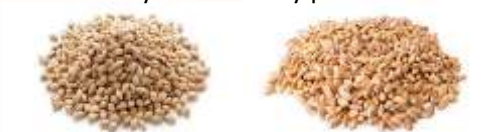

Barley

Wheat

Absorption

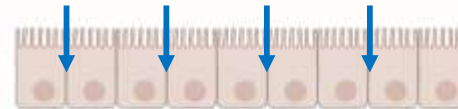

Passive paracellular diffusion mechanism

Biological activities

Chemopreventive / Anti-inflammatory / Hypocholesterolemic

Immunomodulatory

## Main Objective

Evaluation of the antioxidant and immunomodulatory activity of a lunasin enriched soybean extract in murine RAW 264.7 macrophages

### Specific Objective 1

**Characterization** by electrophoresis and Western-Blot of the **protein profile** of the lunasin enriched soybean extract

### Specific Objective 2

Study of the **behavior** of the lunasin enriched soybean extract under conditions that **simulate the gastrointestinal digestion process**

### Specific Objective 3

Study of the effect of the lunasin-enriched extract on **biomarkers associated with oxidative stress and the immune response**

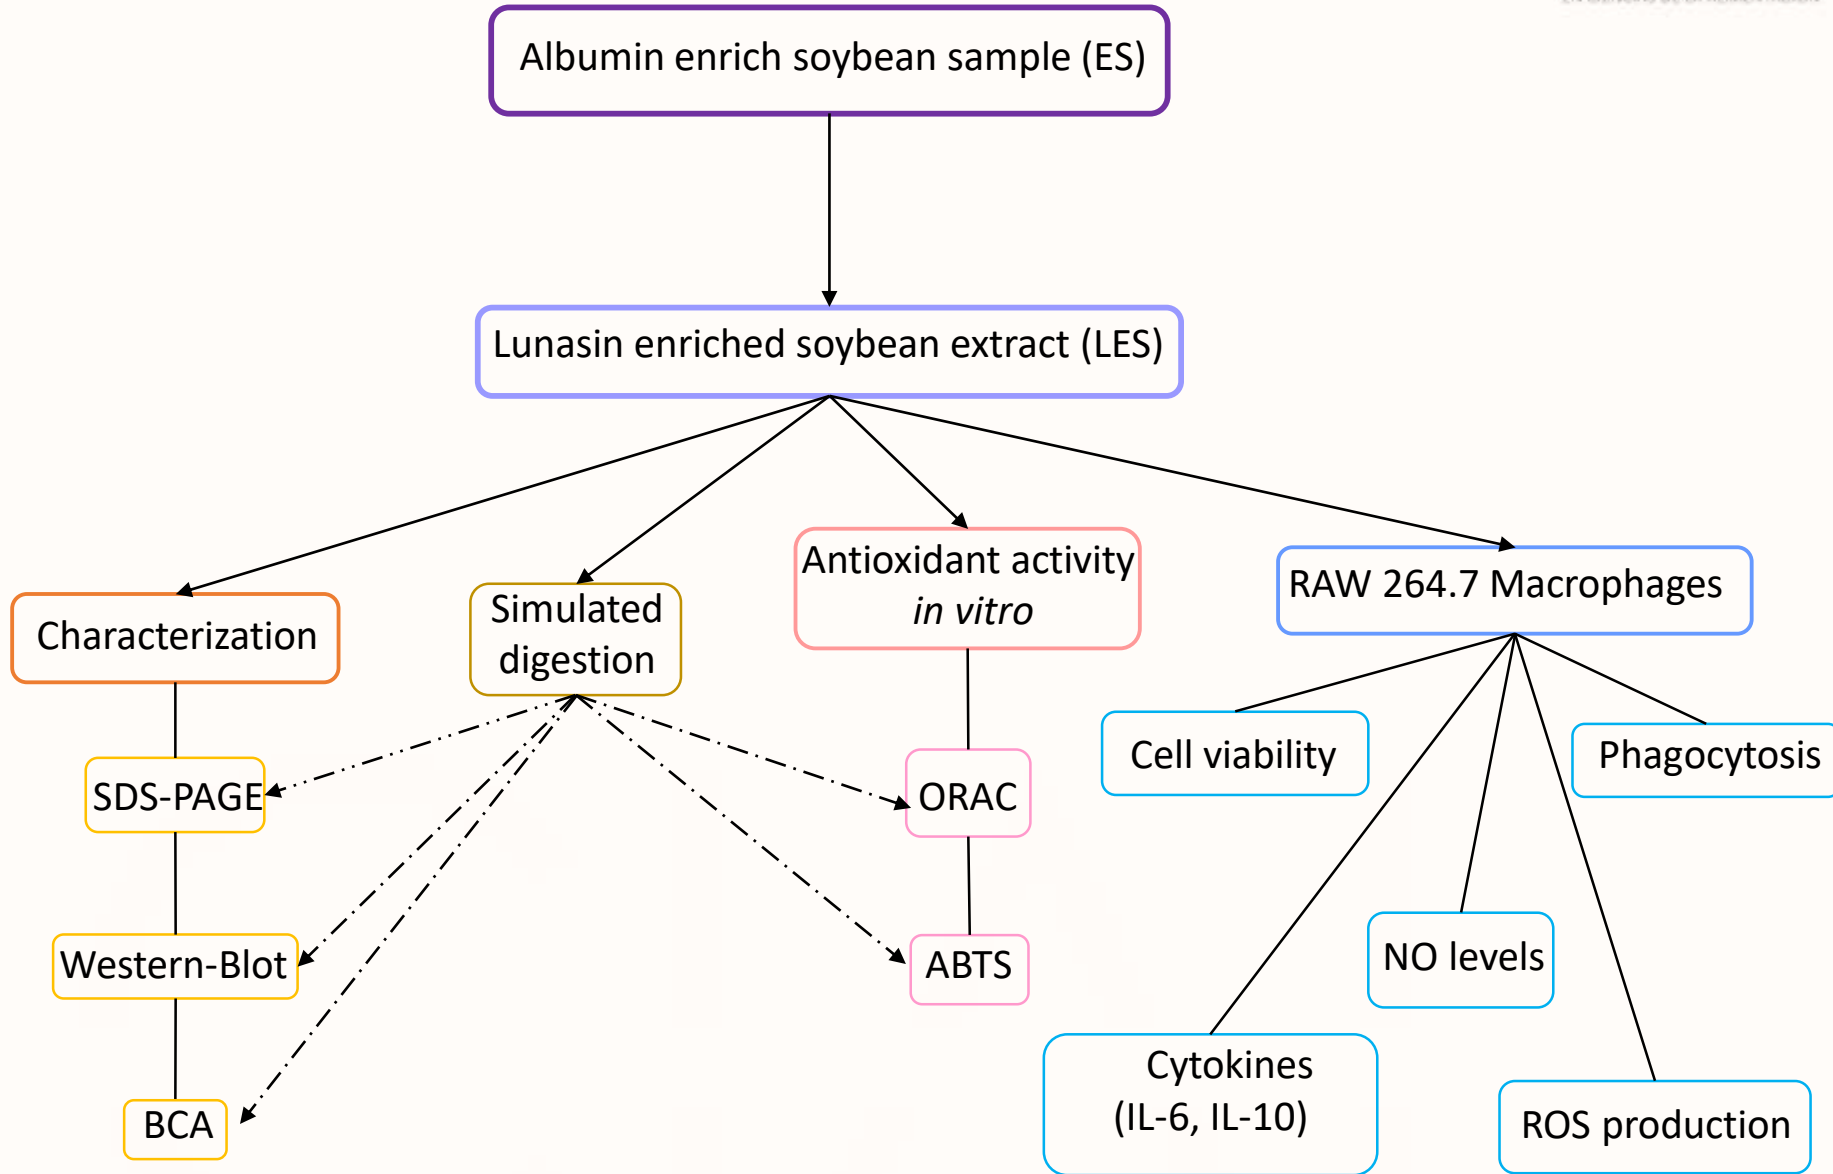

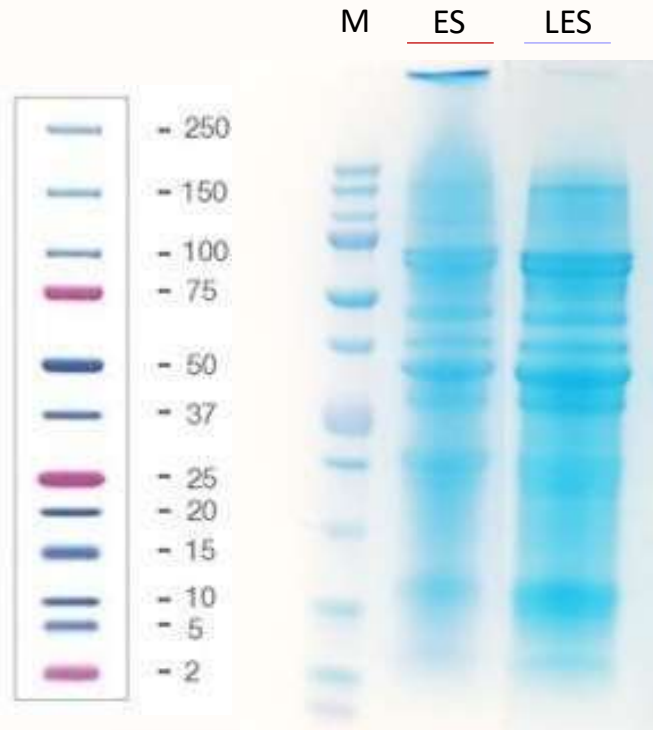

Synthetic Lunasin

LES

## SDS-PAGE electrophoresis

- **Similar profiles** for ES and LES, although bands in LES showed more intensity
- Identification of 4-138 kDa bands

**Presence of the major soybean proteins:**  $\beta$ -conglycinin, glycinin and their corresponding subunits

## Western-Blot

- Identification of lunasin's **monomeric and dimeric forms**

**16.42 mg lunasin/g of protein**  
**2.07 mg lunasin/g of extract**

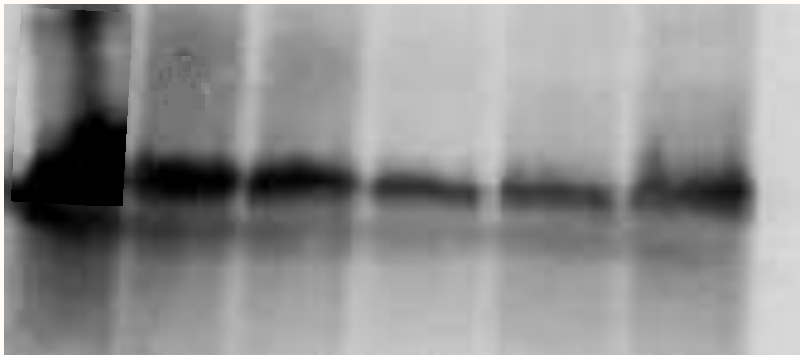

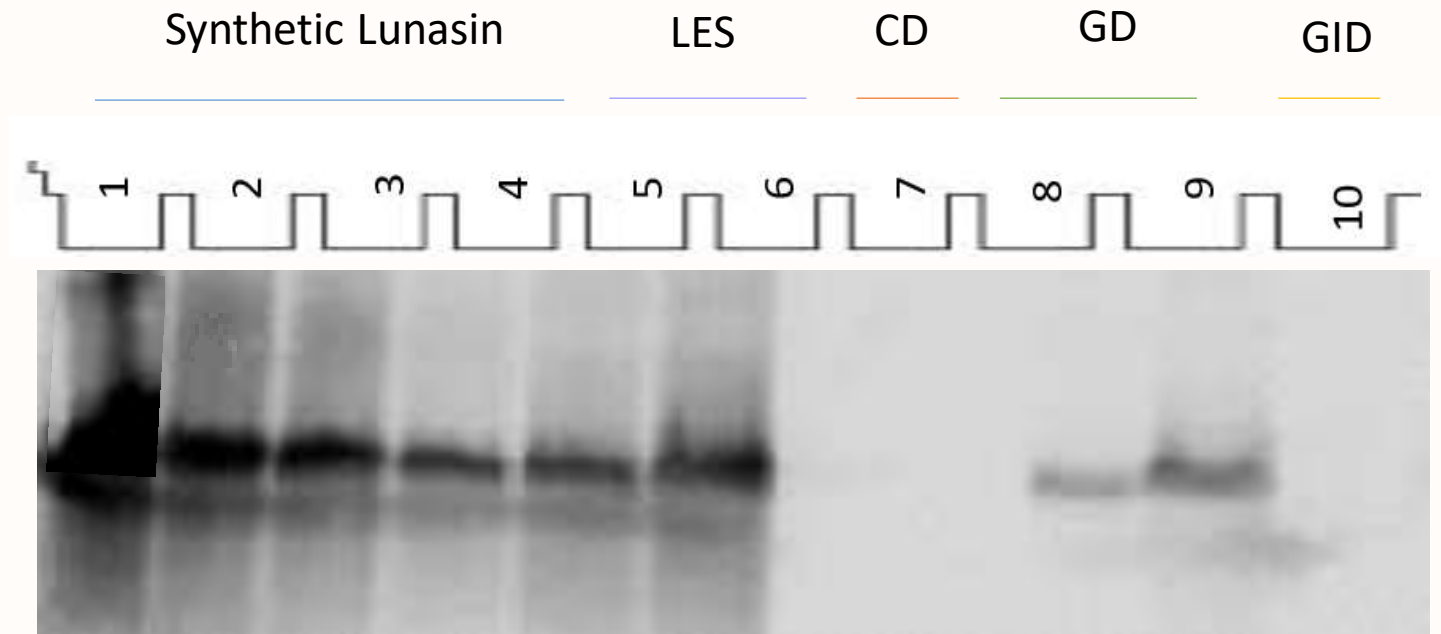

**60%** of the initial lunasin was detected in **GD**

**2.88%** of the initial lunasin was detected in **GID**

**Protease inhibitors** (Bowman-Birk inhibitor or Kunitz inhibitor) potentially present in LES **could be responsible for the greater resistance** of lunasin to the digestive process

Neutralizing capacity

ES < LES

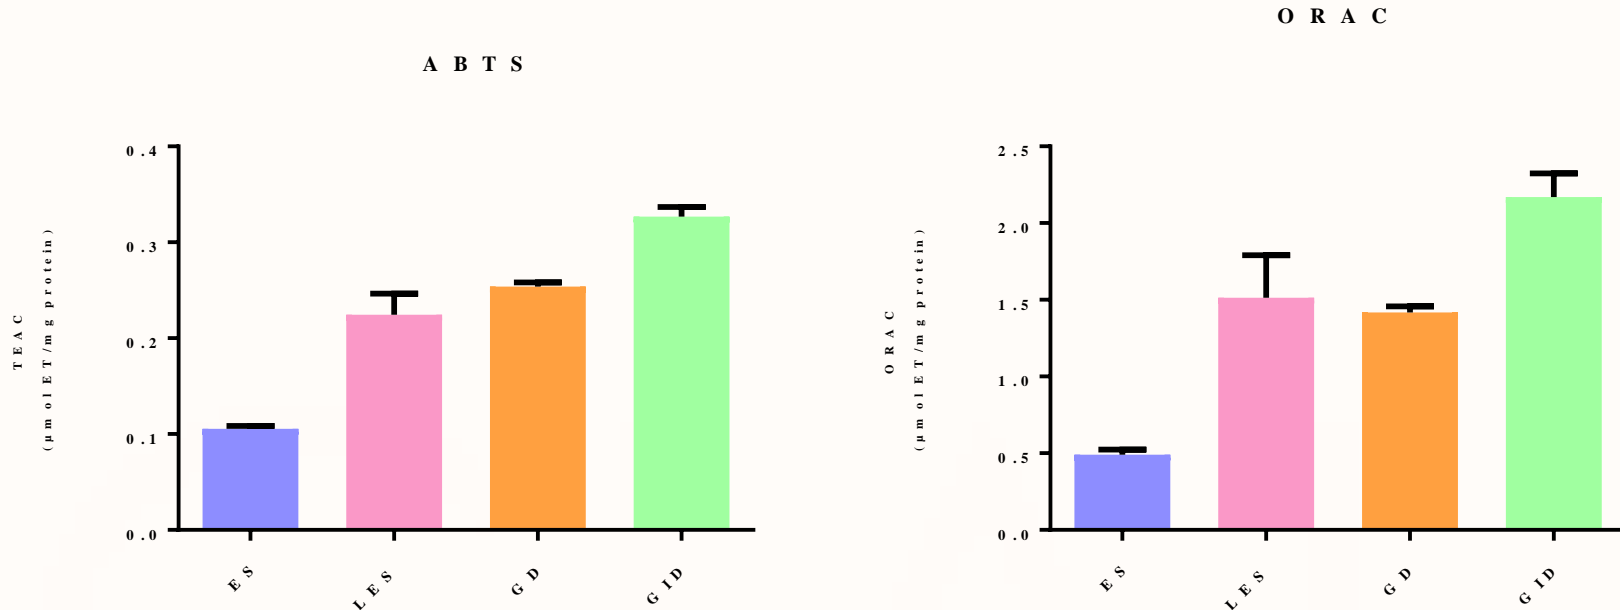

Soluble proteins and small peptides: **responsible for the antioxidant activity**

The antioxidant activity was **higher after the gastrointestinal digestion**



## Cell Viability (MTT assay)

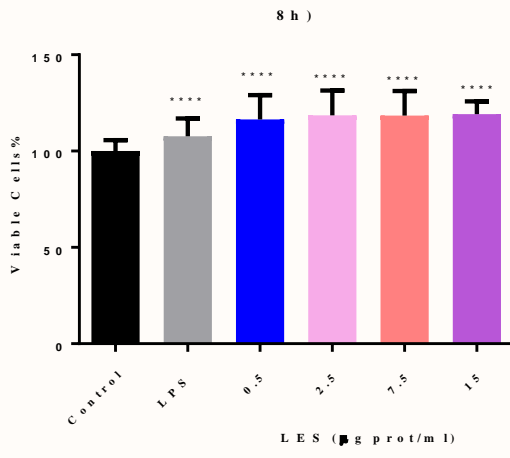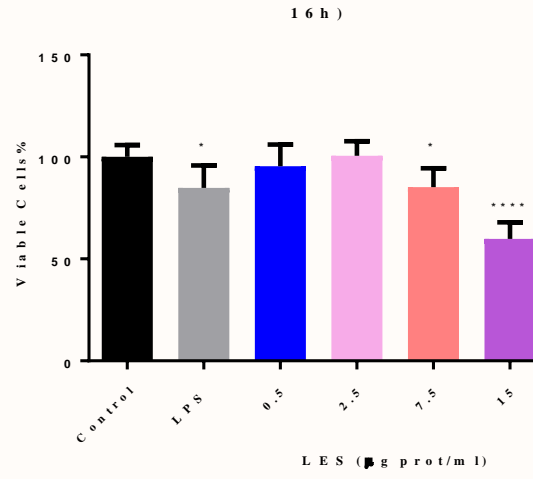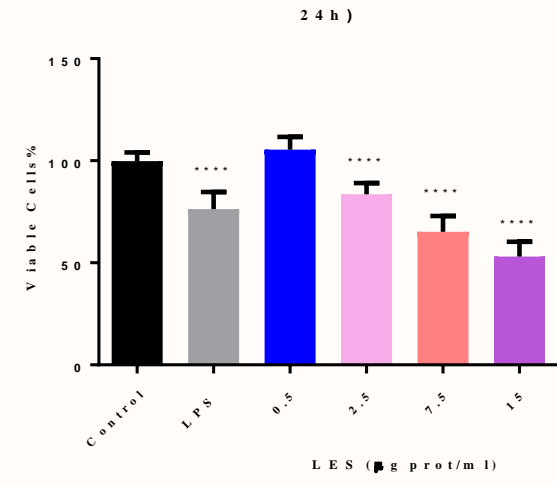

**Significant and dose-dependent increase** in the % of viable cells was observed after first **8 h**

**Longer treatment times** resulted in **significant reduction of cell viability**

## NO Production (Griess assay)

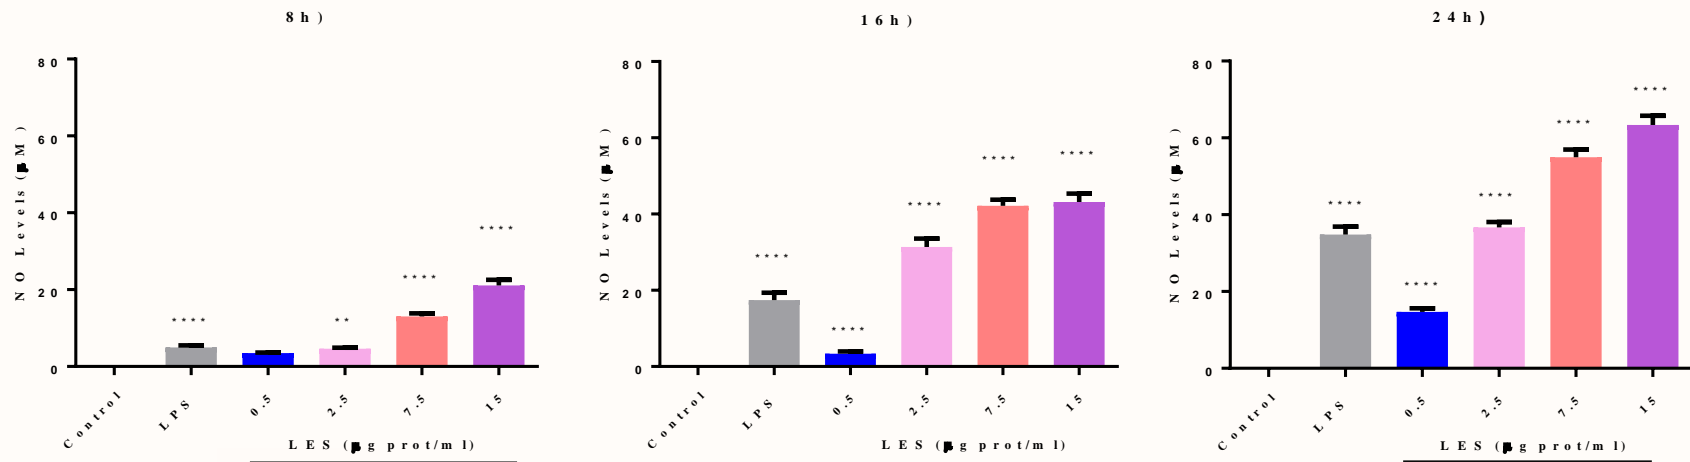

Induction of the **release of NO** was **provoked** by the treatment with both **LPS** and **LES**

For **LES**, the **induction** was **dose- and time-dependent**,  
reaching values higher than 60 µM at LES doses of 15 µg protein/mL for 24 h

## Phagocytic Activity

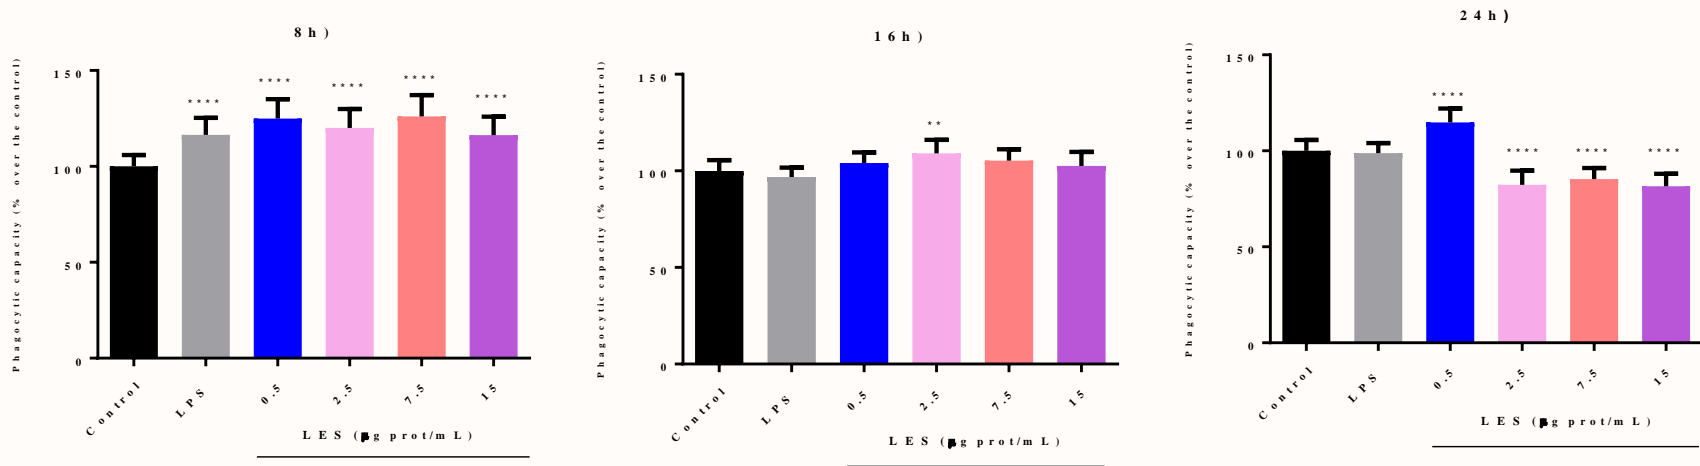

After **8 h** of treatment with LES, the **phagocytic capacity** was significantly increased, with a similar behaviour to that of LPS

After **16 h**, no changes were observed **except** for **2.5 µg prot/mL** of LES

At **24h**, only the **lower concentration** caused an increase in phagocytic capacity, **while the higher concentrations** caused a **significant decrease**.

## ROS Production

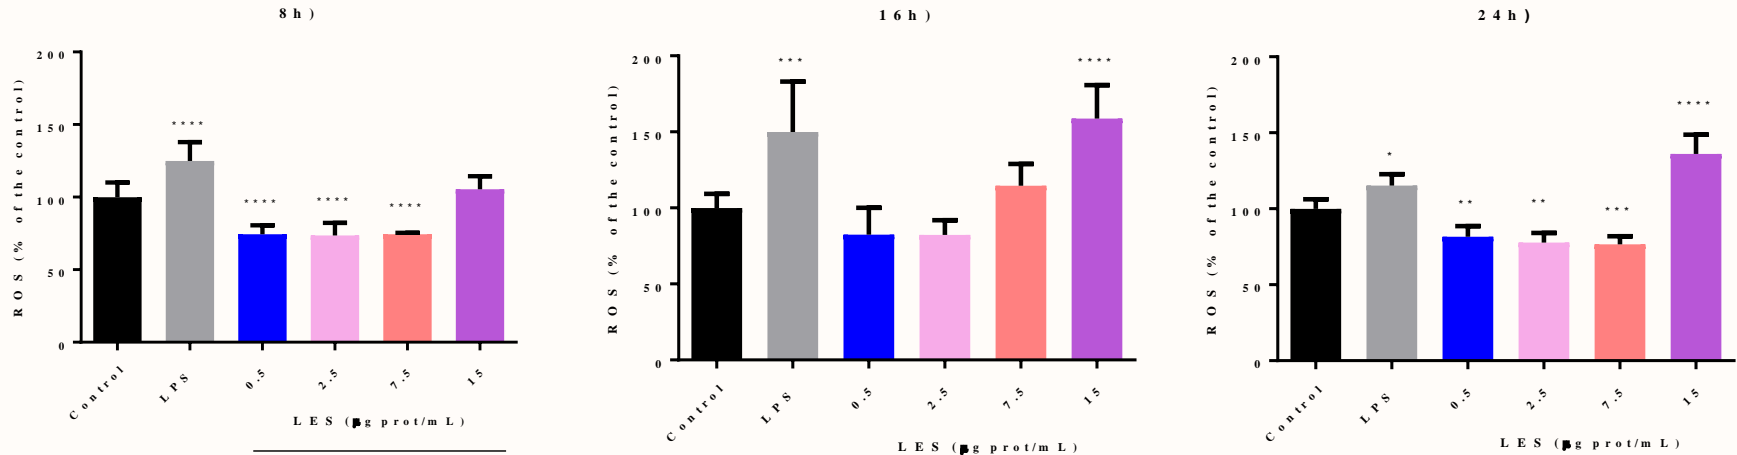

**LES** at concentrations of **0.5, 2.5 and 7.5 µg protein/mL** exerted a **protective effect against oxidative stress**, decreasing ROS levels at the **three treatment times**

The **highest concentration** caused an **oxidizing effect** at the three times tested, similarly to LPS

## Cytokines Production

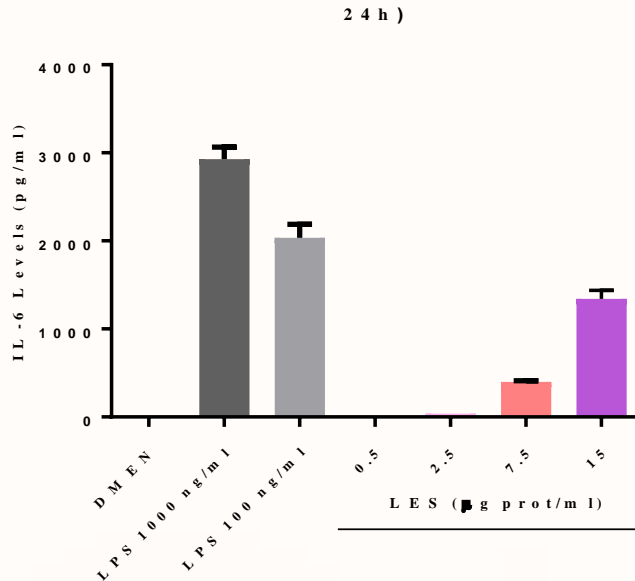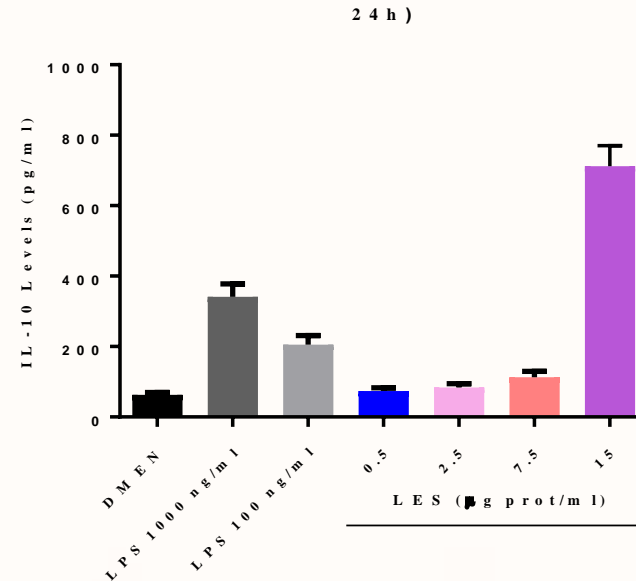

LES induced the liberation of IL-6 in a dose-dependent manner.

LES induced the liberation of IL-10 in a dose-dependent manner. At LES highest concentration, the levels of IL-10 were even higher than the LPS.

1. An **enrichment** in soluble proteins and small peptides such as lunasin, whose concentration was **2.07 mg lunasin/g of LES**, was achieved. The **protease inhibitors** could exert a **protective effect** against digestive enzymes, allowing lunasin to partially **resist the digestive process**.
2. The **small and medium peptides** were **responsible for the radical neutralizing activity**. After the simulated digestive process, the activity increased, indicating that peptides released during digestive process were more potent as antioxidants.
3. LES presented, in a **dose- and time-dependent manner**, an **immunomodulatory activity** in RAW 264.7 macrophages as demonstrated by changes in the levels of **NO and ROS**, and in the **phagocytic activity** of the cells. LES, also had a **dose-dependent** effect in the liberation of proinflammatory (IL-6) and antiinflammatory **cytokines** (IL-10).
